# Supplementary material
Source: PubMed Central journal article supplement (PMC2911329)
Supplement: supp_M110.122564_jbc.M110.122564-1.pdf [file supp_M110.122564_jbc.M110.122564-1.pdf]

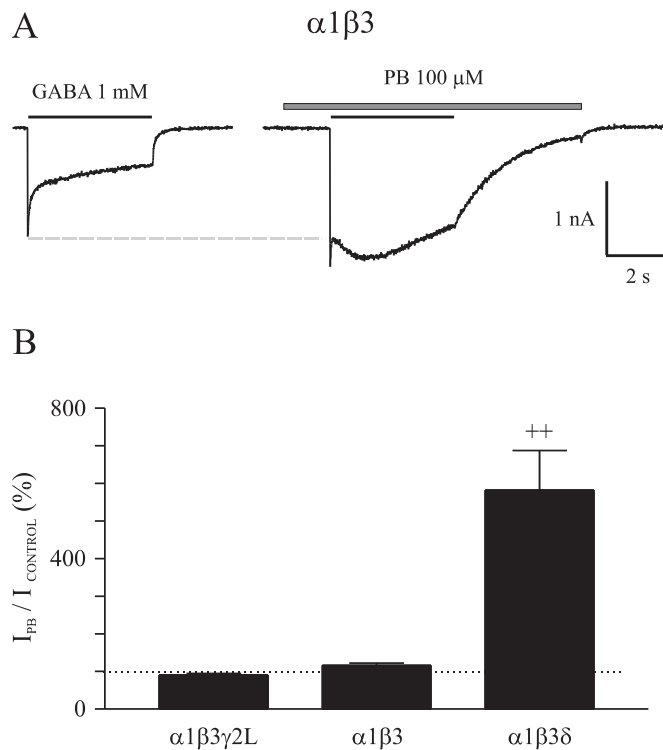

**Supplemental Figure 1. The modulation of pentobarbital on the whole cell currents of  $\alpha 1\beta 3$  GABA<sub>A</sub> receptors.**

A, Representative whole cell current traces evoked by a saturating concentration of GABA (1 mM) (left trace) as well as co-application of GABA (1 mM) and pentobarbital (100  $\mu$ M) with pentobarbital (100  $\mu$ M) pre-applied for 1.5 sec (right trace). The solid line above each current trace denotes the duration (4 sec) of GABA application, and the hatched bar represents the duration of pentobarbital application. B, Comparison of the mean extent of enhancement by pentobarbital of  $\alpha 1\beta 3$  receptor currents with that of  $\alpha 1\beta 3\delta$  and  $\alpha 1\beta 3\gamma 2L$  receptor currents. Pentobarbital slightly enhanced peak currents of  $\alpha 1\beta 3$  receptors (116.9  $\pm$  6.3%, n = 4). The current enhancement of  $\alpha 1\beta 3$  receptors was significantly smaller than that of  $\alpha 1\beta 3\delta$  receptors but was not significantly different from that of  $\alpha 1\beta 3\gamma 2L$  receptors. The dashed line in panel B indicates 100%, and error bars denote SEM.

++ Significantly different from  $\alpha 1\beta 3$  or  $\alpha 1\beta 3\gamma 2L$  receptors at p < 0.01 (One-way ANOVA followed by Newman-Keuls Multiple Comparison Test).
